# Supplementary material for: Internet Access and Use by Patients with Gynecologic Malignancies: A Cross-Sectional Study
Source: MDPI journal article supplement (doi:10.3390/cancers16091677), 2024-04-26
Supplement: s1 [file s1]

### Supplementary Table S1

|                                    |                                   | Age                |                  |                  |                  |                  | Educati<br>on    |                  |                  | Cancer<br>entity  |                    |                  |                           |
|------------------------------------|-----------------------------------|--------------------|------------------|------------------|------------------|------------------|------------------|------------------|------------------|-------------------|--------------------|------------------|---------------------------|
|                                    |                                   | All                | <49<br>years     | 50-59<br>years   | 60-69<br>years   | >70<br>years     | Low              | Middle           | High             | Ovarian<br>Cancer | Cervical<br>Cancer | Vulvar<br>cancer | Endome<br>trial<br>Cancer |
| Computer<br>property               |                                   | 133/146<br>(91.1%) | 37/38<br>(97.4%) | 42/45<br>(93.3%) | 38/42<br>(90.5%) | 16/21<br>(76.2%) | 15/20<br>(75%)   | 41/46<br>(89.1%) | 76/79<br>(96.2%) | 41/46<br>(89.1%)  | 37/39<br>(94.9%)   | 30/33<br>(90.9%) | 24/28<br>(89.3%)          |
| Computer<br>experience             | no                                | 11/147<br>(7.5%)   | 0/38<br>0%       | 2/44<br>(4.5%)   | 5/43<br>(11.6%)  | 4/22<br>(18.2%)  | 6/21<br>(28.6%)  | 4/46<br>(8.7%)   | 1/79<br>(1.3%)   | 4/48<br>(8.3%)    | 2/39<br>(5.1%)     | 3/33<br>(9.1%)   | 2/27<br>(7.4%)            |
|                                    | low                               | 23/147<br>(15.6%)  | 0/38<br>0%       | 7/44<br>(15.9%)  | 8/43<br>(18.6%)  | 8/22<br>(36.4%)  | 6/21<br>(28.6%)  | 9/46<br>(19.6%)  | 7/79<br>(8.9%)   | 11/48<br>(22.9%)  | 3/39<br>(7.7%)     | 2/33<br>(6.1%)   | 7/27<br>(25.9%)           |
|                                    | good                              | 79/147<br>(53.7%)  | 20/38<br>(52.6%) | 27/44<br>(61.4%) | 24/43<br>(55.8%) | 8/22<br>(36.4%)  | 9/21<br>(42.9%)  | 25/46<br>(54.3%) | 45/79<br>(57%)   | 26/48<br>(54.2%)  | 18/39<br>(46.2%)   | 23/33<br>(69.7%) | 12/27<br>(44.4%)          |
|                                    | very good                         | 34/147<br>(23.1%)  | 18/38<br>(47.4%) | 8/44<br>(18.2%)  | 6/43<br>(14%)    | 2/22<br>(9.1%)   | 0/21<br>0%       | 8/46<br>(17.4%)  | 26/79<br>(32.9%) | 7/48<br>(14.6%)   | 16/39<br>(41%)     | 5/33<br>(15.2%)  | 6/27<br>(22.2%)           |
| Computer<br>use                    | Work                              | 8/132<br>(6.1%)    | 5/37<br>(13.5%)  | 2/41<br>(4.9%)   | 1/38<br>(2.6%)   | 0/16<br>0%       | 0/16<br>0%       | 2/39<br>(5.1%)   | 6/76<br>(7.9%)   | 1/41<br>(2.4%)    | 4/37<br>(10.8%)    | 1/28<br>(3.6%)   | 2/26<br>(7.7%)            |
|                                    | Home                              | 56/132<br>(42.4%)  | 5/37<br>(13.5%)  | 16/41<br>(39%)   | 23/38<br>(60.5%) | 12/16<br>(75%)   | 14/16<br>(87.5%) | 20/39<br>(51.3%) | 21/76<br>(27.6%) | 21/41<br>(51.2%)  | 11/37<br>(29.7%)   | 12/28<br>(42.9%) | 12/26<br>(46.2%)          |
|                                    | Work +<br>Home                    | 68/132<br>(51.5%)  | 27/37<br>(73%)   | 23/41<br>(56.1%) | 14/38<br>(36.8%) | 4/16<br>(25%)    | 2/16<br>(12.5%)  | 17/39<br>(43.6%) | 49/76<br>(64.5%) | 19/41<br>(46.3%)  | 22/37<br>(59.5%)   | 15/28<br>(53.6%) | 12/26<br>(46.2%)          |
| Phone without<br>internet          |                                   | 94/133<br>70.7%    | 14/34<br>41.2%   | 26/38<br>68.4%   | 32/39<br>82.1%   | 22/22<br>100%    | 16/18<br>88.9%   | 32/44<br>72.7%   | 44/69<br>63.8%   | 34/44<br>77.3%    | 15/31<br>48.4%     | 24/31<br>77.4%   | 21/27<br>77.8%            |
| Phone with Internet/<br>Smartphone |                                   | 114/133<br>85.7%   | 34/39<br>87.2%   | 33/38<br>86.8%   | 33/39<br>84.6%   | 14/22<br>63.6%   | 13/18<br>72.2%   | 37/44<br>84.1%   | 63/69<br>91.3%   | 38/44<br>86.4%    | 28/31<br>90.3%     | 25/31<br>80.6%   | 23/27<br>85.2%            |
| Tablet                             |                                   | 43/132<br>32.6%    | 15/34<br>44.1%   | 11/37<br>29.7%   | 10/39<br>25.6%   | 7/22<br>31.8%    | 0/18<br>0%       | 14/44<br>31.8%   | 29/68<br>42.6%   | 12/43<br>27.9%    | 15/31<br>48.4%     | 8/31<br>25.8%    | 8/27<br>29.6%             |
| Internet<br>access                 |                                   | 138/144<br>(95.8%) | 38/38<br>(100%)  | 41/42<br>(97.6%) | 40/43<br>(93%)   | 19/21<br>(90.5%) | 18/20<br>(90%)   | 42/44<br>(95.5%) | 77/79<br>(97.5%) | 44/46<br>(95.7%)  | 38/38<br>(100%)    | 31/33<br>(93.9%) | 25/27<br>(92.6%)          |
| Internet use                       | By<br>themselves                  | 133/145<br>(91.7%) | 38/38<br>(100%)  | 42/44<br>(95.5%) | 36/42<br>(85.7%) | 17/21<br>(81%)   | 16/21<br>(76.2%) | 40/44<br>(90.9%) | 76/79<br>(96.2%) | 43/48<br>(89.6%)  | 36/38<br>(94.7%)   | 29/32<br>(90.6%) | 25/27<br>(92.6%)          |
|                                    | Indirectly via<br>friends/ family | 3/145<br>(2.1%)    | 0/38<br>0%       | 0/44<br>0%       | 2/42<br>(4.8%)   | 1/21<br>(4.8%)   | 1/21<br>(4.8%)   | 1/44<br>(2.3%)   | 1/79<br>(1.3%)   | 2/48<br>(4.2%)    | 1/38<br>(2.6%)     | 0/32<br>0%       | 0/27<br>0%                |
|                                    | no                                | 9/145<br>(6.2%)    | 0/38<br>0%       | 2/44<br>(4.5%)   | 4/42<br>(9.5%)   | 3/21<br>(14.3%)  | 4/21<br>(19%)    | 3/44<br>(6.8%)   | 2/79<br>(2.5%)   | 3/48<br>(6.3%)    | 1/38<br>(2.6%)     | 3/32<br>(9.4%)   | 2/27<br>(7.4%)            |
| Frequency of<br>internet use       | Daily                             | 107/139<br>(77%)   | 37/38<br>(97.4%) | 35/43<br>(81.4%) | 25/40<br>(62.5%) | 10/18<br>(55.6%) | 8/18<br>(44.4%)  | 28/42<br>(66.7%) | 71/78<br>(91%)   | 31/46<br>(67.4%)  | 33/37<br>(89.2%)   | 23/30<br>(76.7%) | 20/26<br>(76.9%)          |
|                                    | Several<br>times/ week            | 22/139<br>(15.8%)  | 1/38<br>(2.6%)   | 8/43<br>(18.6%)  | 8/40<br>(20%)    | 5/18<br>(27.8%)  | 5/18<br>(27.8%)  | 10/42<br>(23.8%) | 6/78<br>(7.7%)   | 10/46<br>(21.7%)  | 3/37<br>(8.1%)     | 5/30<br>(16.7%)  | 4/26<br>(15.4%)           |
|                                    | Several<br>times/ month           | 5/139<br>(3.6%)    | 0/38<br>0%       | 0/43<br>0%       | 3/40<br>(7.5%)   | 2/18<br>(11.1%)  | 1/18<br>(5.6%)   | 3/42<br>(7.1%)   | 1/78<br>(1.3%)   | 3/46<br>(6.5%)    | 1/37<br>(2.7%)     | 1/30<br>(3.3%)   | 1/26<br>(3.8%)            |
|                                    | Less than<br>1x/month             | 5/139<br>(3.6%)    | 0/38<br>0%       | 0/43<br>0%       | 4/40<br>(10%)    | 1/18<br>(5.6%)   | 4/18<br>(22.2%)  | 1/42<br>(2.4%)   | 0/78<br>0%       | 2/46<br>(4.3%)    | 0/37<br>0%         | 1/30<br>(3.3%)   | 1/26<br>(3.8%)            |
